# Supplementary material for: Design and analysis of statistical probability distribution and non-parametric trend analysis for reference evapotranspiration
Source: PeerJ. 2021 Jun 18;9:e11597. doi: 10.7717/peerj.11597 (PMC8216168; doi:10.7717/peerj.11597)
Supplement: Supplemental Information 1 [file peerj-09-11597-s001.docx]

| Station | Northern Latitude | Eastern Longitude | Elevation (m) |
| --- | --- | --- | --- |
| Balakot | 34o33' | 72o20' | 995 |
| Cherat | 33o49' | 71o33' | 1372 |
| Chitral | 35o51' | 71o50' | 1500 |
| D.I Khan | 31o49' | 70o55' | 173 |
| Dir | 35o11' | 71o52' | 1375 |
| Drosh | 35o34' | 71o48' | 1465 |
| Kakul | 34o10' | 73o15' | 1309 |
| Parachinar | 33o52' | 70o40' | 1725 |
| Peshawar | 34o02' | 71o56' | 327 |
| Risalpur | 34o04' | 71o99' | 317 |
| Saidu Sharif | 34o44' | 72o21' | 961 |
| Kohat | 33 o35' | 71 o29' | 508 |

**Note: Geographical information are taken from http://www.pmd.gov.pk/en/**
